# Supplementary material for: Study to Test and Operationalize Preventive Approaches for CKD of Undetermined Etiology in Andhra Pradesh, India
Source: PubMed Central journal article supplement — Kidney Int Rep. 2019 Jun 21;4(10):1412–9. doi: 10.1016/j.ekir.2019.06.003 (PMC6829197; doi:10.1016/j.ekir.2019.06.003), 2019-06-21
Supplement: mmc1.pdf [file mmc1.pdf]

**STOP CKDu AP**

**Population Survey and follow up**

**Instruction to the interviewer: HAS THE PARTICIPANT SIGNED THE INFORMED CONSENT? DO NOT PROCEED UNTIL THE CONSENT FORM HAS BEEN SIGNED.**

**Survey Information**

| Location and Date                    | Response                         |
|--------------------------------------|----------------------------------|
| Household ID                         | _ _ _ _ _ _ _ _ _                |
| Participant ID                       | _ _ _ _ _ _ _ _ _                |
| Interviewer ID                       | _ _ _                            |
| Aadhaar Number                       |                                  |
| Date of completion of the instrument | _ _ _ _ _ _ _ _ _ <br>dd mm year |

| Consent, Interview Language and Name | Response                        |
|--------------------------------------|---------------------------------|
| Consent has been read and obtained   | Yes 1<br>No 2 <b>If NO, END</b> |
| Time of interview<br>(24 hour clock) | _ _  :  _ _ <br>hrs mins        |

**SECTION 1: SOCIO DEMOGRAPHIC DATA**

|     |                                                                                                      |                                                   |                                     |                                                    |
|-----|------------------------------------------------------------------------------------------------------|---------------------------------------------------|-------------------------------------|----------------------------------------------------|
| 1.1 | Patient's name                                                                                       | _____<br>First Name                               | _____<br>Middle Name                | _____<br>Last Name                                 |
| 1.2 | Patient's home address<br>(refer aadhar card or voter ID)<br><br>GPS Coordinates                     | Altitude  _ _ _ _                                 | Latitude  _ _ _ _                   |                                                    |
| 1.3 | Birth date (patient's)<br><br>Write age in years if birth date not available                         | _____<br>Day                                      | _____<br>Month                      | _____<br>Year<br><br>Age in completed years: _____ |
|     | <b>Questions</b>                                                                                     | <b>Coding categories</b>                          |                                     | <b>Responses</b>                                   |
| 1.4 | Sex                                                                                                  | Male 1                                            | Female 2                            | <input type="checkbox"/>                           |
|     |                                                                                                      | Transgender 3                                     |                                     |                                                    |
| 1.5 | Education (highest attained degree)<br><i>#Involved in decision making, laying down policies and</i> | Professional degree <sup>#</sup> /post graduate 1 | Graduate (B.A/B.Sc/B.Com/Diploma) 2 | <input type="checkbox"/>                           |

|     |                                                                                                                                                                                                                                                                                                                                                                                                                                                       |                                                                                                                                                                                                                                                                                                                                                                                                                                                                                                                        |                                                                                                                                                        |
|-----|-------------------------------------------------------------------------------------------------------------------------------------------------------------------------------------------------------------------------------------------------------------------------------------------------------------------------------------------------------------------------------------------------------------------------------------------------------|------------------------------------------------------------------------------------------------------------------------------------------------------------------------------------------------------------------------------------------------------------------------------------------------------------------------------------------------------------------------------------------------------------------------------------------------------------------------------------------------------------------------|--------------------------------------------------------------------------------------------------------------------------------------------------------|
|     | <p><i>executing them-Doctors, senior administrative officers, senior lecturers, readers, professors, principals of colleges, advocates, engineers, bank manager</i></p> <p><i>* A person who can both read and write with understanding in any language without any formal education or passed any minimum educational standard.</i></p> <p><i>** A person, who can neither read nor write or can only read but cannot write in any language.</i></p> | Secondary School / Intermediary (ITI course, class XII/X or Intermediate) 3<br>High school (class V to IX) 4<br>Primary School (upto Class IV) 5<br>*Literate, no formal education 6<br>**Illiterate 7<br>Others 8<br>9                                                                                                                                                                                                                                                                                                | Other, specify<br><hr/>                                                                                                                                |
| 1.6 | Occupation                                                                                                                                                                                                                                                                                                                                                                                                                                            | Professional, big business, landlord, university teacher, class 1 IAS/services officer, lawyer 1<br>Trained, clerical, medium business owner, middle level farmer, teacher, maintenance (in charge), personnel manager 2<br>Skilled manual labourer, small business owner, small farmer, army jawan 3<br>Semi-skilled manual labourer, marginal landowner, rickshaw driver, carpenter, fitter 4<br>Unskilled manual labourer, landless labourer 5<br>Student 6<br>Housewife 7<br>Retired 8<br>Unemployed 9<br>Other 10 | <div style="border: 1px solid black; width: 40px; height: 20px; margin: 0 auto;"></div> <p style="text-align: center;"><b>Other, specify</b></p> <hr/> |
| 1.7 | Income                                                                                                                                                                                                                                                                                                                                                                                                                                                | <3000 1<br>3000-10,000 2<br>10,001-20,000 3<br>20,001-30,000 4<br>30,001-40,000 5<br>40,001-50,000 6<br>>50,000 7<br>Refused 8<br>Don't know 9                                                                                                                                                                                                                                                                                                                                                                         | <p style="text-align: center;"><b>Income in INR/ month</b></p> <div style="border: 1px solid black; width: 60px; height: 20px; margin: 0 auto;"></div> |

## Step 2 Behavioural Measurements

### Tobacco, Alcohol usage

Now I am going to ask you some questions about tobacco use.

|     | Question                                                                                       | Response                                                                                                                                                                               |                          |
|-----|------------------------------------------------------------------------------------------------|----------------------------------------------------------------------------------------------------------------------------------------------------------------------------------------|--------------------------|
| 2.1 | Have you ever consumed tobacco in any form (smoking, chewing, snuff, etc.)?                    | Yes                                                                                                                                                                                    | 1                        |
|     |                                                                                                | No                                                                                                                                                                                     | 2 If No, go to 2.4       |
| 2.2 | In what forms have you consumed tobacco?<br>[Yes=1; No=2]                                      | a. In a smoking form<br>b. In a chewed form<br>c. In any other form (snuff, toothpaste, etc.) <input type="checkbox"/><br><input type="checkbox"/><br><input type="checkbox"/>         |                          |
| 2.4 | Have you consumed any alcohol within the past 30 days?                                         | Yes                                                                                                                                                                                    | 1                        |
|     |                                                                                                | No                                                                                                                                                                                     | 2 If No, go to 2.6       |
| 2.5 | How often do you consume alcoholic beverages?<br><br>*Occasionally means less than once a week | Consuming alcohol regularly 1<br>Consuming alcohol occasionally* 2<br>Used alcohol in the past (stopped more than months ago) 3<br>Recently stopped alcohol (less than 6 months ago) 4 | <input type="checkbox"/> |

### Physical activity

| Vigorous physical activities |                                                                                                                                                                                                                                                                            |
|------------------------------|----------------------------------------------------------------------------------------------------------------------------------------------------------------------------------------------------------------------------------------------------------------------------|
| 2.6                          | During the <b>last 7 days</b> , did you do <b>vigorous</b> physical activities like heavy lifting, digging, running, boat rowing, or fast bicycling ( <b>Yes=1 ; No=2</b> ).<br><br>Yes <input type="checkbox"/><br>No <input type="checkbox"/><br>If No skip if Q.No: 2.9 |
| 2.7                          | No. of days involvement in vigorous-intensity activities in a week <input type="text"/>                                                                                                                                                                                    |
| 2.8                          | How much time did you usually spend doing vigorous physical activities on one of those days?<br>Hr <input type="text"/> <input type="text"/> Min <input type="text"/> <input type="text"/>                                                                                 |
| Moderate physical activities |                                                                                                                                                                                                                                                                            |
| 2.9                          | During the <b>last 7 days</b> , did you do <b>moderate</b> physical activities like carrying light loads, bicycling at a regular pace, or volley ball, kabbadi?<br><br>Yes <input type="checkbox"/><br>No <input type="checkbox"/><br>If No skip if Q.No: 2.12             |

|                                          |                                                                                                                                                                                                                                                                    |                                                                                            |
|------------------------------------------|--------------------------------------------------------------------------------------------------------------------------------------------------------------------------------------------------------------------------------------------------------------------|--------------------------------------------------------------------------------------------|
|                                          | Do not include walking. (Yes=1; No=2).                                                                                                                                                                                                                             |                                                                                            |
| 2.10                                     | No. of days involvement in moderate-intensity activities in a week                                                                                                                                                                                                 | Days <input type="text"/>                                                                  |
| 2.11                                     | How much time did you usually spend doing moderate physical activities on one of those days?                                                                                                                                                                       | Hr <input type="text"/> <input type="text"/> Min <input type="text"/> <input type="text"/> |
| <b>Mild physical activity or walking</b> |                                                                                                                                                                                                                                                                    |                                                                                            |
| 2.12                                     | During the <b>last 7 days</b> , did you do <b>mild</b> physical or walking. This includes at work and at home, walking to travel from place to place, and any other walking that you have done solely for recreation, sport, exercise, or leisure. (Yes=1 ; No=2). | Yes <input type="text"/><br>No <input type="text"/><br>If No skip if Q.No: 2.14            |
| 2.13                                     | No. of days involvement in mild physical activities in a week                                                                                                                                                                                                      | Days <input type="text"/>                                                                  |
| 2.14                                     | How much time did you usually spend doing mild physical activities on one of those days?                                                                                                                                                                           | Hr <input type="text"/> <input type="text"/> Min <input type="text"/> <input type="text"/> |

**Section 3: Food frequency questionnaire ( The WHO STEPwise approach to non-communicable disease risk factor surveillance (STEPS)**

|     |                                                                                                            |                                                                                                       |
|-----|------------------------------------------------------------------------------------------------------------|-------------------------------------------------------------------------------------------------------|
| 3.1 | In a typical week, on how many days do you eat fruit?                                                      | No of Days <input type="text"/> If zero, skip to Q.no: 3.3                                            |
| 3.2 | How many servings of fruit do you eat on one of those days?                                                | Number of servings <input type="text"/>                                                               |
| 3.3 | In a typical week, on how many days do you eat vegetables?                                                 | Days <input type="text"/> If zero, skip to Q.no:3.5                                                   |
| 3.4 | How many servings of vegetables do you eat on one of those days?                                           | Number of servings <input type="text"/>                                                               |
| 3.5 | In a typical week, how often do you add salt to your food right before you eat it or as you are eating it? | 1. Always<br>2. Often<br>3. Sometimes <input type="text"/><br>4. Rarely<br>5. Never<br>6. Don't known |
| 3.6 | In a typical week, how often is salt, added in cooking or preparing foods in your household?               | 1. Always<br>2. Often<br>3. Sometimes <input type="text"/>                                            |

|     |                                                                                                                                                                                                |                                                                                  |
|-----|------------------------------------------------------------------------------------------------------------------------------------------------------------------------------------------------|----------------------------------------------------------------------------------|
|     |                                                                                                                                                                                                | 4. Rarely<br>5. Never<br>6. Don't known                                          |
| 3.7 | In a typical week, how often do you eat <b>processed food high in salt</b> ?<br><br>Eg: such as packaged salty snacks, canned salty food including pickles and preserves, dry fishes, Papadis. | 1. Always<br>2. Often<br>3. Sometimes<br>4. Rarely<br>5. Never<br>6. Don't known |

### Section 4: Family History

|     |                                                                                                                                        |                                                                                                                                     |                                                                                                                                                                                  |
|-----|----------------------------------------------------------------------------------------------------------------------------------------|-------------------------------------------------------------------------------------------------------------------------------------|----------------------------------------------------------------------------------------------------------------------------------------------------------------------------------|
| 4.1 | Has anyone in your family suffered from any of the following diseases, <b>before the age of 60 years?</b> [Yes=1; No=2; Don't know= 9] | a) High Blood Sugar<br>b) High blood pressure<br>c) Heart disease*<br>d) Chronic Kidney Diseases<br>e) Musculo skeletal<br>f) Caner | A <input type="checkbox"/><br>B <input type="checkbox"/><br>C <input type="checkbox"/><br>D <input type="checkbox"/><br>E <input type="checkbox"/><br>F <input type="checkbox"/> |
|-----|----------------------------------------------------------------------------------------------------------------------------------------|-------------------------------------------------------------------------------------------------------------------------------------|----------------------------------------------------------------------------------------------------------------------------------------------------------------------------------|

Fill in the table below: **For Kidney diseases.** The following questions are related to your grandparents, your parents and your siblings. They all would be named as first-degree relatives in the following questions.

| Relationship to the family member                                                                          | Yes=1, No=2 | Age at diagnosis (in years)<br>Don't Know button=999 | If dead, age at which the family member died |
|------------------------------------------------------------------------------------------------------------|-------------|------------------------------------------------------|----------------------------------------------|
| (1)                                                                                                        | (2)         | (3)                                                  | (4)                                          |
| a) Father                                                                                                  |             |                                                      |                                              |
| b) Mother                                                                                                  |             |                                                      |                                              |
| c) Son                                                                                                     |             |                                                      |                                              |
| d) Daughter                                                                                                |             |                                                      |                                              |
| e) Brother                                                                                                 |             |                                                      |                                              |
| f) Sister                                                                                                  |             |                                                      |                                              |
| <b>For others, please write the relationship to the participant and provide the required details below</b> |             |                                                      |                                              |
| g)                                                                                                         |             |                                                      |                                              |
| h)                                                                                                         |             |                                                      |                                              |

### Section 5: Cultural Habits

|     |                                                               |                                 |                          |
|-----|---------------------------------------------------------------|---------------------------------|--------------------------|
| 5.1 | Do marriages take place with someone from within the village? | 1. Yes<br>2. No<br>3. Sometimes | <input type="checkbox"/> |
| 5.2 | Is gotra a consideration while fixing up marriages?           | 1. Yes<br>2. No<br>3. Sometimes | <input type="checkbox"/> |
| 5.3 | Do marriages take place within the same family?               | 1. Yes<br>2. No<br>3. Sometimes | <input type="checkbox"/> |

Schema for understanding the family history of an individual

**Family History: Affected box needs to be shaded**

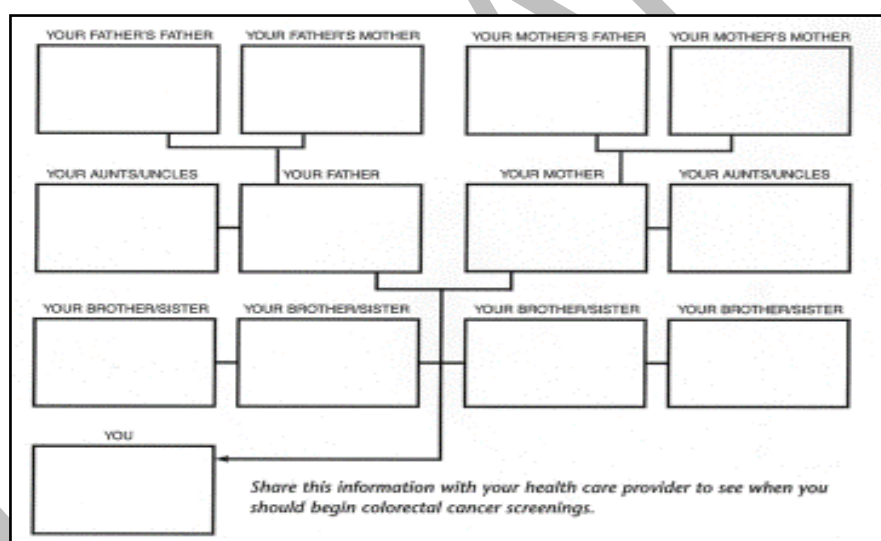

**Section 6: Knowledge Attitude and Practice assessment [Comprehensive Kidney Disease Assessment for risk factors, epidemiology, Knowledge, and Attitudes (CKD AFRiKA) Study]**

| Knowledge of Kidney Disease: (answer yes, no, do not know, or unsure) |                                                                                                |                                     |                  |                          |
|-----------------------------------------------------------------------|------------------------------------------------------------------------------------------------|-------------------------------------|------------------|--------------------------|
| 6.1                                                                   | Do you think high blood pressure can cause kidney disease?                                     | Yes<br>No<br>Do not known<br>Unsure | 1<br>2<br>3<br>4 | <input type="checkbox"/> |
| 6.2                                                                   | Do you think that high blood sugar (diabetes mellitus) can cause kidney disease?               | Yes<br>No<br>Do not known<br>Unsure | 1<br>2<br>3<br>4 | <input type="checkbox"/> |
| 6.3                                                                   | Do you think that drinking alcohol and or smoking or chewing tobacco can cause kidney disease? | Yes<br>No<br>Do not known           | 1<br>2<br>3      | <input type="checkbox"/> |

|      |                                                                                                            |                                     |                  |                          |
|------|------------------------------------------------------------------------------------------------------------|-------------------------------------|------------------|--------------------------|
|      |                                                                                                            | Unsure                              | 4                |                          |
| 6.4  | Can a person can tell if he/she has kidney disease just by the colour, quality, or smell of his/her urine. | Yes<br>No<br>Do not known<br>Unsure | 1<br>2<br>3<br>4 | <input type="checkbox"/> |
| 6.5  | Do you think that kidney disease can only be diagnosed by a test at the hospital?                          | Yes<br>No<br>Do not known<br>Unsure | 1<br>2<br>3<br>4 | <input type="checkbox"/> |
| 6.6  | Do you think that kidney disease can be prevented if you follow the advice of a Medical Doctor?            | Yes<br>No<br>Do not known<br>Unsure | 1<br>2<br>3<br>4 | <input type="checkbox"/> |
| 6.7  | Do you think using high amount painkillers can damage kidney?                                              | Yes<br>No<br>Do not known<br>Unsure | 1<br>2<br>3<br>4 | <input type="checkbox"/> |
| 6.8  | The kidneys filter waste products from the blood?                                                          | Yes<br>No<br>Do not known<br>Unsure | 1<br>2<br>3<br>4 | <input type="checkbox"/> |
| 6.9  | Dialysis is a form of treatment for kidney disease.                                                        | Yes<br>No<br>Do not known<br>Unsure | 1<br>2<br>3<br>4 | <input type="checkbox"/> |
| 6.10 | Antibiotics are a form of treatment for kidney disease?                                                    | Yes<br>No<br>Do not known<br>Unsure | 1<br>2<br>3<br>4 | <input type="checkbox"/> |

**Attitudes about Kidney Disease: (answer yes or no)**

|      |                                                                                                                                 |  |  |                          |
|------|---------------------------------------------------------------------------------------------------------------------------------|--|--|--------------------------|
| 6.11 | Have you thought that you may have kidney problems?<br><i>[Yes=1; No=2]</i>                                                     |  |  | <input type="checkbox"/> |
| 6.12 | Will you go to rural medical practitioner for kidney problem and follow up<br><i>[Yes=1; No=2]</i>                              |  |  | <input type="checkbox"/> |
| 6.13 | If you found out that you have kidney problems, would you be worried about your future? <i>[Yes=1; No=2]</i>                    |  |  | <input type="checkbox"/> |
| 6.14 | Would you be worried about your reputation in the community if you found out that you have kidney disease? <i>[Yes=1; No=2]</i> |  |  | <input type="checkbox"/> |
| 6.15 | Would you be worried about your ability to work if you found out that you have kidney problems? <i>[Yes=1; No=2]</i>            |  |  | <input type="checkbox"/> |
| 6.16 | Would you be worried about your chances of survival if you found out that you have kidney problems? <i>[Yes=1; No=2]</i>        |  |  | <input type="checkbox"/> |
| 6.17 | Do you think that kidney disease is a problem in Uddanam area?<br><i>[Yes=1; No=2]</i>                                          |  |  | <input type="checkbox"/> |

|      |                                                                                                 |                          |
|------|-------------------------------------------------------------------------------------------------|--------------------------|
| 6.18 | Do you think that the cost of kidney disease would be a problem for you? [ <i>Yes=1; No=2</i> ] | <input type="checkbox"/> |
|------|-------------------------------------------------------------------------------------------------|--------------------------|

**Practices of Kidney Disease: (answer very unlikely, unlikely, likely, or very likely)**

**If you found out that you have kidney problems...**

|      |                                                                                                             |                                                    |                  |                          |
|------|-------------------------------------------------------------------------------------------------------------|----------------------------------------------------|------------------|--------------------------|
| 6.19 | How likely would you be to seek care from a traditional healer/ RMP?                                        | very unlikely<br>unlikely<br>likely<br>very likely | 1<br>2<br>3<br>4 | <input type="checkbox"/> |
| 6.20 | How likely would you be to seek self-treatment at home?                                                     | very unlikely<br>unlikely<br>likely<br>very likely | 1<br>2<br>3<br>4 |                          |
| 6.21 | How likely would you be to seek care at a hospital or health clinic?                                        | very unlikely<br>unlikely<br>likely<br>very likely | 1<br>2<br>3<br>4 | <input type="checkbox"/> |
| 6.22 | Would you be willing to be contacted by Govt. health worker regarding care of your kidneys?                 | very unlikely<br>unlikely<br>likely<br>very likely | 1<br>2<br>3<br>4 | <input type="checkbox"/> |
| 6.23 | Would you be willing to be contacted by non-registered medical practitioner regarding care of your kidneys? | very unlikely<br>unlikely<br>likely<br>very likely | 1<br>2<br>3<br>4 | <input type="checkbox"/> |

Herbal or natural medications are commonly used to treat health problems. Herbal or natural medications may include herbs, teas, foods, creams, lotions, potions, and soups that are used to treat health problems.

|      |                                                                                                             |                                                    |                  |                          |
|------|-------------------------------------------------------------------------------------------------------------|----------------------------------------------------|------------------|--------------------------|
| 6.24 | How likely would you be to use herbal or natural medications if you found out that you have kidney disease? | very unlikely<br>unlikely<br>likely<br>very likely | 1<br>2<br>3<br>4 | <input type="checkbox"/> |
| 6.25 | How likely would you be willing to see a Medical Doctor if you found out that you have kidney problems?     | very unlikely<br>unlikely<br>likely<br>very likely | 1<br>2<br>3<br>4 |                          |

**Section 7: Nature of work**

|     |                                                                                 |                                                                                                                                            |                                                                    |
|-----|---------------------------------------------------------------------------------|--------------------------------------------------------------------------------------------------------------------------------------------|--------------------------------------------------------------------|
| 7.1 | If you are working what do you perform?<br><br>In addition, specifically ask if | 1. Land/farm owner (do not work)<br>2. Agricultural worker<br>3. Cashew harvesting<br>4. Cashew processing worker<br>5. Coconut harvesting | <input type="checkbox"/><br><br><br><br><br>Others please specify: |
|-----|---------------------------------------------------------------------------------|--------------------------------------------------------------------------------------------------------------------------------------------|--------------------------------------------------------------------|



|     |                                                                                                                 |                                                                                                                                                                        |                                                     |
|-----|-----------------------------------------------------------------------------------------------------------------|------------------------------------------------------------------------------------------------------------------------------------------------------------------------|-----------------------------------------------------|
|     |                                                                                                                 | 6. Coconut processing worker<br>7. Fishing<br>8. Construction worker<br>9. Household work<br>10. Teaching<br>11. Office work<br>12. Others<br>13. Not working/ retired | If Q.7.1 is 10, skip to Q: 7.5                      |
| 7.2 | How long have you been working in the current occupation?                                                       | <input type="text"/> <input type="text"/> MM                                                                                                                           | <input type="text"/> <input type="text"/> Years     |
| 7.3 | How many months in a year do you work?                                                                          | <input type="text"/> <input type="text"/> MM                                                                                                                           |                                                     |
| 7.4 | How many hours do you work daily?<br>Please record start time / end time                                        | Start time:                                                                                                                                                            | End time:                                           |
| 7.5 | Have you undertaken migrant work in the last 12 months? (travelled out of your district for work) [Yes=1; No=2] | Yes<br>No                                                                                                                                                              | <input type="checkbox"/><br>If No skip if Q.No: 8.1 |
| 7.6 | How many months of the year are involved in migrant work?                                                       | MM <input type="text"/> <input type="text"/>                                                                                                                           | <input type="text"/> <input type="text"/> Years     |
| 7.7 | Describe what kind of work you undertook as a migrant worker.                                                   | Please specify:                                                                                                                                                        |                                                     |

### Section 8: Intake of medication

|     |                                                                                                                             |           |                          |
|-----|-----------------------------------------------------------------------------------------------------------------------------|-----------|--------------------------|
| 8.1 | During the last 12 months, have you taken regular prescribed medications? (Yes=1, No=2)                                     | Yes<br>No | <input type="checkbox"/> |
| 8.2 | Have you taken pain killer medicines within the past 30 days? (i.e. Combiflam, naproxen, ibuprofen, voveran)? (Yes=1, No=2) | Yes<br>No | <input type="checkbox"/> |
| 8.3 | During the last 30 days, have you taken Furosemide (Lasix)? (Yes=1, No=2)                                                   | Yes<br>No | <input type="checkbox"/> |
| 8.4 | During the last 12 months, have you received antibiotics for injection more than a week?                                    | Yes<br>No | <input type="checkbox"/> |
| 8.5 | During the last 12 months, have or do you take herbal or traditional remedies? (Yes=1, No=2)                                | Yes<br>No | <input type="checkbox"/> |

### Section 9: Usage of Fertilizers

**( Reducing the use of hazardous chemicals in developing countries: potential of implementing safer chemicals including non-chemical alternatives - tools for Georgia and the EECCA region)**

|                                                                                                                     |                                                                                                               |                                                                                                                                                                                                                                                                                                                                                                                                                                                                                                                                                                                                                                                                                                                                                                                                                                                                |                                                                                                                |   |                          |                                                                                                                     |                    |                          |                                                                             |                         |                          |                                             |                          |                          |                               |                    |                          |                                     |   |                          |
|---------------------------------------------------------------------------------------------------------------------|---------------------------------------------------------------------------------------------------------------|----------------------------------------------------------------------------------------------------------------------------------------------------------------------------------------------------------------------------------------------------------------------------------------------------------------------------------------------------------------------------------------------------------------------------------------------------------------------------------------------------------------------------------------------------------------------------------------------------------------------------------------------------------------------------------------------------------------------------------------------------------------------------------------------------------------------------------------------------------------|----------------------------------------------------------------------------------------------------------------|---|--------------------------|---------------------------------------------------------------------------------------------------------------------|--------------------|--------------------------|-----------------------------------------------------------------------------|-------------------------|--------------------------|---------------------------------------------|--------------------------|--------------------------|-------------------------------|--------------------|--------------------------|-------------------------------------|---|--------------------------|
| 9.1                                                                                                                 | Do you do farming or work in farm fields <b>(Yes=1, No=2)</b>                                                 | Yes <input type="checkbox"/><br>No <input type="checkbox"/>                                                                                                                                                                                                                                                                                                                                                                                                                                                                                                                                                                                                                                                                                                                                                                                                    |                                                                                                                |   |                          |                                                                                                                     |                    |                          |                                                                             |                         |                          |                                             |                          |                          |                               |                    |                          |                                     |   |                          |
| 9.2                                                                                                                 | Do you handle pesticides /biocides in farm                                                                    | Yes <input type="checkbox"/><br>No <input type="checkbox"/> If No skip to Q: 10.1                                                                                                                                                                                                                                                                                                                                                                                                                                                                                                                                                                                                                                                                                                                                                                              |                                                                                                                |   |                          |                                                                                                                     |                    |                          |                                                                             |                         |                          |                                             |                          |                          |                               |                    |                          |                                     |   |                          |
| 9.3                                                                                                                 | What type of fertilizer do you handle most?                                                                   | 1. Organic <input type="checkbox"/><br>2. Chemical or synthetic <input type="checkbox"/><br>3. Both <input type="checkbox"/>                                                                                                                                                                                                                                                                                                                                                                                                                                                                                                                                                                                                                                                                                                                                   |                                                                                                                |   |                          |                                                                                                                     |                    |                          |                                                                             |                         |                          |                                             |                          |                          |                               |                    |                          |                                     |   |                          |
| 9.4                                                                                                                 | For how many years have you been handling this fertilizers                                                    | 1. Less than one year <input type="checkbox"/><br>2. One to five years <input type="checkbox"/><br>3. Moret than five years <input type="checkbox"/>                                                                                                                                                                                                                                                                                                                                                                                                                                                                                                                                                                                                                                                                                                           |                                                                                                                |   |                          |                                                                                                                     |                    |                          |                                                                             |                         |                          |                                             |                          |                          |                               |                    |                          |                                     |   |                          |
| 9.5                                                                                                                 | Tick the following inorganic fertilizers applying for your crop. (Multiple tick possible) <b>(Yes=1 No=2)</b> | <table border="0"> <tr> <td>1. Straight Nitrogen Fertilizers (Urea, Ammonium sulphate, Ammonium chloride, Calcium ammonium nitrate, etc.,)</td> <td>1</td> <td><input type="checkbox"/></td> </tr> <tr> <td>2. Straight Phosphorous Fertilizers (Single super phosphate, double super phosphate, triple super phosphate, etc.,)</td> <td>2</td> <td><input type="checkbox"/></td> </tr> <tr> <td>3. Straight Potash Fertilizers (Muriate of potash, potassium sulphate, etc)</td> <td>3</td> <td><input type="checkbox"/></td> </tr> <tr> <td>4. N.P. Complex Fertilizers (DAP – 18:46:0)</td> <td>4</td> <td><input type="checkbox"/></td> </tr> <tr> <td>5. N.P.K. Complex fertilizers</td> <td>5</td> <td><input type="checkbox"/></td> </tr> <tr> <td>6. Mixture (19:9:9, 20:10:10, etc.)</td> <td>6</td> <td><input type="checkbox"/></td> </tr> </table> | 1. Straight Nitrogen Fertilizers (Urea, Ammonium sulphate, Ammonium chloride, Calcium ammonium nitrate, etc.,) | 1 | <input type="checkbox"/> | 2. Straight Phosphorous Fertilizers (Single super phosphate, double super phosphate, triple super phosphate, etc.,) | 2                  | <input type="checkbox"/> | 3. Straight Potash Fertilizers (Muriate of potash, potassium sulphate, etc) | 3                       | <input type="checkbox"/> | 4. N.P. Complex Fertilizers (DAP – 18:46:0) | 4                        | <input type="checkbox"/> | 5. N.P.K. Complex fertilizers | 5                  | <input type="checkbox"/> | 6. Mixture (19:9:9, 20:10:10, etc.) | 6 | <input type="checkbox"/> |
| 1. Straight Nitrogen Fertilizers (Urea, Ammonium sulphate, Ammonium chloride, Calcium ammonium nitrate, etc.,)      | 1                                                                                                             | <input type="checkbox"/>                                                                                                                                                                                                                                                                                                                                                                                                                                                                                                                                                                                                                                                                                                                                                                                                                                       |                                                                                                                |   |                          |                                                                                                                     |                    |                          |                                                                             |                         |                          |                                             |                          |                          |                               |                    |                          |                                     |   |                          |
| 2. Straight Phosphorous Fertilizers (Single super phosphate, double super phosphate, triple super phosphate, etc.,) | 2                                                                                                             | <input type="checkbox"/>                                                                                                                                                                                                                                                                                                                                                                                                                                                                                                                                                                                                                                                                                                                                                                                                                                       |                                                                                                                |   |                          |                                                                                                                     |                    |                          |                                                                             |                         |                          |                                             |                          |                          |                               |                    |                          |                                     |   |                          |
| 3. Straight Potash Fertilizers (Muriate of potash, potassium sulphate, etc)                                         | 3                                                                                                             | <input type="checkbox"/>                                                                                                                                                                                                                                                                                                                                                                                                                                                                                                                                                                                                                                                                                                                                                                                                                                       |                                                                                                                |   |                          |                                                                                                                     |                    |                          |                                                                             |                         |                          |                                             |                          |                          |                               |                    |                          |                                     |   |                          |
| 4. N.P. Complex Fertilizers (DAP – 18:46:0)                                                                         | 4                                                                                                             | <input type="checkbox"/>                                                                                                                                                                                                                                                                                                                                                                                                                                                                                                                                                                                                                                                                                                                                                                                                                                       |                                                                                                                |   |                          |                                                                                                                     |                    |                          |                                                                             |                         |                          |                                             |                          |                          |                               |                    |                          |                                     |   |                          |
| 5. N.P.K. Complex fertilizers                                                                                       | 5                                                                                                             | <input type="checkbox"/>                                                                                                                                                                                                                                                                                                                                                                                                                                                                                                                                                                                                                                                                                                                                                                                                                                       |                                                                                                                |   |                          |                                                                                                                     |                    |                          |                                                                             |                         |                          |                                             |                          |                          |                               |                    |                          |                                     |   |                          |
| 6. Mixture (19:9:9, 20:10:10, etc.)                                                                                 | 6                                                                                                             | <input type="checkbox"/>                                                                                                                                                                                                                                                                                                                                                                                                                                                                                                                                                                                                                                                                                                                                                                                                                                       |                                                                                                                |   |                          |                                                                                                                     |                    |                          |                                                                             |                         |                          |                                             |                          |                          |                               |                    |                          |                                     |   |                          |
| 9.6                                                                                                                 | If there is pesticide left over, where is it disposed? <b>(Yes=1 No=2)</b>                                    | <table border="0"> <tr> <td>1. Yard/farm</td> <td>1</td> <td><input type="checkbox"/></td> <td rowspan="4">Specify</td> </tr> <tr> <td>2. Cannals</td> <td>2</td> <td><input type="checkbox"/></td> </tr> <tr> <td>3. Soild waste disposal</td> <td>3</td> <td><input type="checkbox"/></td> </tr> <tr> <td>4. Others, specify</td> <td>4</td> <td><input type="checkbox"/></td> </tr> </table>                                                                                                                                                                                                                                                                                                                                                                                                                                                                | 1. Yard/farm                                                                                                   | 1 | <input type="checkbox"/> | Specify                                                                                                             | 2. Cannals         | 2                        | <input type="checkbox"/>                                                    | 3. Soild waste disposal | 3                        | <input type="checkbox"/>                    | 4. Others, specify       | 4                        | <input type="checkbox"/>      |                    |                          |                                     |   |                          |
| 1. Yard/farm                                                                                                        | 1                                                                                                             | <input type="checkbox"/>                                                                                                                                                                                                                                                                                                                                                                                                                                                                                                                                                                                                                                                                                                                                                                                                                                       | Specify                                                                                                        |   |                          |                                                                                                                     |                    |                          |                                                                             |                         |                          |                                             |                          |                          |                               |                    |                          |                                     |   |                          |
| 2. Cannals                                                                                                          | 2                                                                                                             | <input type="checkbox"/>                                                                                                                                                                                                                                                                                                                                                                                                                                                                                                                                                                                                                                                                                                                                                                                                                                       |                                                                                                                |   |                          |                                                                                                                     |                    |                          |                                                                             |                         |                          |                                             |                          |                          |                               |                    |                          |                                     |   |                          |
| 3. Soild waste disposal                                                                                             | 3                                                                                                             | <input type="checkbox"/>                                                                                                                                                                                                                                                                                                                                                                                                                                                                                                                                                                                                                                                                                                                                                                                                                                       |                                                                                                                |   |                          |                                                                                                                     |                    |                          |                                                                             |                         |                          |                                             |                          |                          |                               |                    |                          |                                     |   |                          |
| 4. Others, specify                                                                                                  | 4                                                                                                             | <input type="checkbox"/>                                                                                                                                                                                                                                                                                                                                                                                                                                                                                                                                                                                                                                                                                                                                                                                                                                       |                                                                                                                |   |                          |                                                                                                                     |                    |                          |                                                                             |                         |                          |                                             |                          |                          |                               |                    |                          |                                     |   |                          |
| 9.7                                                                                                                 | Where is the equipment washed <b>(Yes=1 No=2)</b>                                                             | <table border="0"> <tr> <td>1. Outside yard/farm</td> <td>1</td> <td><input type="checkbox"/></td> <td rowspan="5">Specify:</td> </tr> <tr> <td>2. Wells at houses</td> <td>2</td> <td><input type="checkbox"/></td> </tr> <tr> <td>3. Bathrooms</td> <td>3</td> <td><input type="checkbox"/></td> </tr> <tr> <td>4. Near by lake or river</td> <td>4</td> <td><input type="checkbox"/></td> </tr> <tr> <td>5. Others, specify</td> <td>5</td> <td><input type="checkbox"/></td> </tr> </table>                                                                                                                                                                                                                                                                                                                                                                | 1. Outside yard/farm                                                                                           | 1 | <input type="checkbox"/> | Specify:                                                                                                            | 2. Wells at houses | 2                        | <input type="checkbox"/>                                                    | 3. Bathrooms            | 3                        | <input type="checkbox"/>                    | 4. Near by lake or river | 4                        | <input type="checkbox"/>      | 5. Others, specify | 5                        | <input type="checkbox"/>            |   |                          |
| 1. Outside yard/farm                                                                                                | 1                                                                                                             | <input type="checkbox"/>                                                                                                                                                                                                                                                                                                                                                                                                                                                                                                                                                                                                                                                                                                                                                                                                                                       | Specify:                                                                                                       |   |                          |                                                                                                                     |                    |                          |                                                                             |                         |                          |                                             |                          |                          |                               |                    |                          |                                     |   |                          |
| 2. Wells at houses                                                                                                  | 2                                                                                                             | <input type="checkbox"/>                                                                                                                                                                                                                                                                                                                                                                                                                                                                                                                                                                                                                                                                                                                                                                                                                                       |                                                                                                                |   |                          |                                                                                                                     |                    |                          |                                                                             |                         |                          |                                             |                          |                          |                               |                    |                          |                                     |   |                          |
| 3. Bathrooms                                                                                                        | 3                                                                                                             | <input type="checkbox"/>                                                                                                                                                                                                                                                                                                                                                                                                                                                                                                                                                                                                                                                                                                                                                                                                                                       |                                                                                                                |   |                          |                                                                                                                     |                    |                          |                                                                             |                         |                          |                                             |                          |                          |                               |                    |                          |                                     |   |                          |
| 4. Near by lake or river                                                                                            | 4                                                                                                             | <input type="checkbox"/>                                                                                                                                                                                                                                                                                                                                                                                                                                                                                                                                                                                                                                                                                                                                                                                                                                       |                                                                                                                |   |                          |                                                                                                                     |                    |                          |                                                                             |                         |                          |                                             |                          |                          |                               |                    |                          |                                     |   |                          |
| 5. Others, specify                                                                                                  | 5                                                                                                             | <input type="checkbox"/>                                                                                                                                                                                                                                                                                                                                                                                                                                                                                                                                                                                                                                                                                                                                                                                                                                       |                                                                                                                |   |                          |                                                                                                                     |                    |                          |                                                                             |                         |                          |                                             |                          |                          |                               |                    |                          |                                     |   |                          |

|      |                                                                                        |                                                                                                                                                                      |                                                                                                                                                                                                                                              |                         |
|------|----------------------------------------------------------------------------------------|----------------------------------------------------------------------------------------------------------------------------------------------------------------------|----------------------------------------------------------------------------------------------------------------------------------------------------------------------------------------------------------------------------------------------|-------------------------|
| 9.8  | Do you wear protective clothing when applying pesticides?<br>(Yes=1, No=2)             | Yes<br>No                                                                                                                                                            | <input type="checkbox"/>                                                                                                                                                                                                                     | If No skip to Qno: 9.10 |
| 9.9  | If yes for above question, check one or more of the following                          | 1. Gloves<br>2. Eye glasses<br>3. Face masks<br>4. Respiratory/nose masks<br>5. Boots/shoes<br>6. Long sleeves pants<br>7. Long sleeves shirts<br>8. Others, specify | 1 <input type="checkbox"/><br>2 <input type="checkbox"/><br>3 <input type="checkbox"/><br>4 <input type="checkbox"/><br>5 <input type="checkbox"/><br>6 <input type="checkbox"/><br>7 <input type="checkbox"/><br>8 <input type="checkbox"/> |                         |
| 9.10 | Are there washing facilities (for your hands and body) where you apply the pesticides? | Yes<br>No                                                                                                                                                            | <input type="checkbox"/>                                                                                                                                                                                                                     |                         |

### Section 10: Exposure to heat stress at workplace

|      |                                                                                                                |                                                                                                      |                          |                                   |
|------|----------------------------------------------------------------------------------------------------------------|------------------------------------------------------------------------------------------------------|--------------------------|-----------------------------------|
| 10.1 | During the last 12 months, your current work was carried out mostly at?                                        | 1. Indoors<br>2. Mostly indoors<br>3. Outdoors<br>4. Mostly outdoors<br>5. Not working or bed ridden | <input type="checkbox"/> | If Q10.1 is 5, Skip to Q. no 11.1 |
| 10.2 | During the last 12 months, how often did you experience high temperatures that made you uncomfortable at work? | 1. Often<br>2. Sometimes<br>3. Rarely<br>4. Never                                                    | <input type="checkbox"/> |                                   |
| 10.3 | During the last 12 months, was there shade available during breaks in your workplace? (Yes=1; No=2)            | Yes<br>No                                                                                            | <input type="checkbox"/> |                                   |

### Section 11: Drinking water source and consumption ( The water balance questionnaire)

#### Fluid Consumption

Mark the quantity of water you consumed per day during the last month

|      |                                                                                                          |                                                                                                                                                                                                                                                                                                |                                                                                                                                                                                                                                                                                                                                                                                            |
|------|----------------------------------------------------------------------------------------------------------|------------------------------------------------------------------------------------------------------------------------------------------------------------------------------------------------------------------------------------------------------------------------------------------------|--------------------------------------------------------------------------------------------------------------------------------------------------------------------------------------------------------------------------------------------------------------------------------------------------------------------------------------------------------------------------------------------|
| 11.1 | What is the source for your water consumption and cooking?<br>Any other, please specify<br>(Yes=1; No=2) | <ol style="list-style-type: none"> <li>1. Bore Well/ Tube Well</li> <li>2. Village pond</li> <li>3. Well</li> <li>4. Piped water supply Govt.</li> <li>5. Municipality water supply-tankers</li> <li>6. RO water Govt supply</li> <li>7. RO water private supply</li> <li>8. Others</li> </ol> | <ol style="list-style-type: none"> <li>1 <input type="checkbox"/></li> <li>2 <input type="checkbox"/></li> <li>3 <input type="checkbox"/></li> <li>4 <input type="checkbox"/></li> <li>5 <input type="checkbox"/></li> <li>6 <input type="checkbox"/></li> <li>7 <input type="checkbox"/></li> <li>8 <input type="checkbox"/></li> </ol> <p style="text-align: right;"><b>Specify:</b></p> |
| 11.2 | Do you use glass to drink water?<br>(Yes=1; No=2)                                                        | Yes<br><br>No                                                                                                                                                                                                                                                                                  | If No skip to Q 11.4<br><br><input type="checkbox"/>                                                                                                                                                                                                                                                                                                                                       |
| 11.3 | If yes, mark how many glasses of water you consumed per day                                              | <ol style="list-style-type: none"> <li>1. One glass</li> <li>2. Two to four</li> <li>3. Five to seven</li> <li>4. More than seven</li> </ol>                                                                                                                                                   | <input type="checkbox"/>                                                                                                                                                                                                                                                                                                                                                                   |
| 11.4 | Do you use bottle to drink water?<br>(Yes=1; No=2)                                                       | Yes<br><br>No                                                                                                                                                                                                                                                                                  | If No skip to Q 11.6<br><br><input type="checkbox"/>                                                                                                                                                                                                                                                                                                                                       |
| 11.5 | If yes, mark how many bottles of litres you consumed per day                                             | <ol style="list-style-type: none"> <li>1. One litres</li> <li>2. Two to three litres</li> <li>3. Three to Four litres</li> <li>4. More than Four litres</li> </ol>                                                                                                                             | <input type="checkbox"/>                                                                                                                                                                                                                                                                                                                                                                   |
| 11.6 | The expulsion of urine from your body/day corresponds to:                                                | <ol style="list-style-type: none"> <li>1. 1t/day</li> <li>2. 2 to 4 t/day</li> <li>3. 5 to 7 t/day</li> <li>4. 8 to 10t/day</li> <li>5. More than 10 t/day</li> </ol>                                                                                                                          | <input type="checkbox"/>                                                                                                                                                                                                                                                                                                                                                                   |

**Mark HOW OFTEN you consumed the following fluids during the last month (Please tick mark)**

|       | Items                                                     | Never/Rare | 1-2t/week | 3-6 t/ week | 1-2 t/day | 3-4 t/day | >5 t/day |
|-------|-----------------------------------------------------------|------------|-----------|-------------|-----------|-----------|----------|
| 11.7a | Coconut water (1 glass /300ml)                            |            |           |             |           |           |          |
| 11.7b | Drinks (soda, cool drinks eg: 1glass /300ml,500ml bottel) |            |           |             |           |           |          |
| 11.7c | Coffee (one cup)                                          |            |           |             |           |           |          |
| 11.7d | Tea or herbal tea (one cup)                               |            |           |             |           |           |          |

|                                    |                                                                             |     |    |  |  |  |                          |
|------------------------------------|-----------------------------------------------------------------------------|-----|----|--|--|--|--------------------------|
| 11.7e                              | Alcoholic drinks (wine, beer, whisky, vodka) one glass                      |     |    |  |  |  |                          |
| <b>Trends in fluid consumption</b> |                                                                             |     |    |  |  |  |                          |
| 11.8                               | Do you usually carry water with you when you are out of home: (Yes=1; No=2) | Yes | No |  |  |  | <input type="checkbox"/> |

**Section 12: QUALITY OF LIFE (EQ-5D)** © 1990 EuroQol Group. EQ-5D™ is a trademark of the EuroQol Group.

By writing a code from the options in the box, please indicate which statements best describe your own state of **health today**.

|      |                                                                                 |                                                          |   |                          |
|------|---------------------------------------------------------------------------------|----------------------------------------------------------|---|--------------------------|
| 12.1 | Mobility                                                                        | I have no problems in walking about                      | 1 | <input type="checkbox"/> |
|      |                                                                                 | I have some problems in walking about                    | 2 |                          |
|      |                                                                                 | I am confined to bed                                     | 3 |                          |
| 12.2 | Self-Care                                                                       | I have no problems with self-care                        | 1 | <input type="checkbox"/> |
|      |                                                                                 | I have some problems washing or dressing myself          | 2 |                          |
|      |                                                                                 | I am unable to wash or dress myself                      | 3 |                          |
| 12.3 | Usual Activities<br>(e.g. work, study, housework, family or leisure activities) | I have no problems with performing my usual activities   | 1 | <input type="checkbox"/> |
|      |                                                                                 | I have some problems with performing my usual activities | 2 |                          |
|      |                                                                                 | I am unable to perform my usual activities               | 3 |                          |
| 12.4 | Pain/ Discomfort                                                                | I have no pain or discomfort                             | 1 | <input type="checkbox"/> |
|      |                                                                                 | I have moderate pain or discomfort                       | 2 |                          |
|      |                                                                                 | I have extreme pain or discomfort                        | 3 |                          |
| 12.5 | Anxiety/ Depression                                                             | I am not anxious or depressed                            | 1 | <input type="checkbox"/> |
|      |                                                                                 | I am moderately anxious or depressed                     | 2 |                          |
|      |                                                                                 | I am extremely anxious or depressed                      | 3 |                          |

**SECTION 13 : PHQ-12 (Modified from the PHQ-9 by CURES study, and validated in an Indian population)**

In the **last two weeks**, have you been bothered by any of the following problems?

|      |                                 |     |   |                          |                    |                         |   |                          |
|------|---------------------------------|-----|---|--------------------------|--------------------|-------------------------|---|--------------------------|
| 13.1 | Feeling sad, blue or depressed. | Yes | 1 | <input type="checkbox"/> | If yes, how often? | Several days            | 1 | <input type="checkbox"/> |
|      |                                 | No  | 2 |                          |                    | More than half the days | 2 |                          |
|      |                                 |     |   |                          |                    | Nearly every day        | 3 |                          |

|      |                                                  |               |                          |                    |                                                                   |                          |
|------|--------------------------------------------------|---------------|--------------------------|--------------------|-------------------------------------------------------------------|--------------------------|
| 13.2 | Loss of interest or pleasure in most things.     | Yes 1<br>No 2 | <input type="checkbox"/> | If yes, how often? | Several days 1<br>More than half the days 2<br>Nearly every day 3 | <input type="checkbox"/> |
| 13.3 | Feeling tired or low on energy most of the time. | Yes 1<br>No 2 | <input type="checkbox"/> | If yes, how often? | Several days 1<br>More than half the days 2<br>Nearly every day 3 | <input type="checkbox"/> |
| 13.4 | Loss of appetite or weight loss.                 | Yes 1<br>No 2 | <input type="checkbox"/> | If yes, how often? | Several days 1<br>More than half the days 2<br>Nearly every day 3 | <input type="checkbox"/> |
| 13.5 | Overeating or weight gain.                       | Yes 1<br>No 2 | <input type="checkbox"/> | If yes, how often? | Several days 1<br>More than half the days 2<br>Nearly every day 3 | <input type="checkbox"/> |
| 13.6 | Trouble falling asleep or staying asleep.        | Yes 1<br>No 2 | <input type="checkbox"/> | If yes, how often? | Several days 1<br>More than half the days 2<br>Nearly every day 3 | <input type="checkbox"/> |
| 13.7 | Sleeping too much.                               | Yes 1<br>No 2 | <input type="checkbox"/> | If yes, how often? | Several days 1<br>More than half the days 2<br>Nearly every day 3 | <input type="checkbox"/> |
| 13.8 | More trouble than usual concentrating on things. | Yes 1<br>No 2 | <input type="checkbox"/> | If yes, how often? | Several days 1<br>More than half the days 2<br>Nearly every day 3 | <input type="checkbox"/> |

|       |                                                                                               |               |                          |                    |                                                                   |                          |
|-------|-----------------------------------------------------------------------------------------------|---------------|--------------------------|--------------------|-------------------------------------------------------------------|--------------------------|
| 13.9  | Feeling down on yourself no good, or worthless.                                               | Yes 1<br>No 2 | <input type="checkbox"/> | If yes, how often? | Several days 1<br>More than half the days 2<br>Nearly every day 3 | <input type="checkbox"/> |
| 13.10 | Being fidgety or restless that you move around more than usual.                               | Yes 1<br>No 2 | <input type="checkbox"/> | If yes, how often? | Several days 1<br>More than half the days 2<br>Nearly every day 3 | <input type="checkbox"/> |
| 13.11 | Moved or spoke so slowly that other people could have noticed.                                | Yes 1<br>No 2 | <input type="checkbox"/> | If yes, how often? | Several days 1<br>More than half the days 2<br>Nearly every day 3 | <input type="checkbox"/> |
| 13.12 | Thought about death more than usual, either your own, or someone else's, or death in general. | Yes 1<br>No 2 | <input type="checkbox"/> | If yes, how often? | Several days 1<br>More than half the days 2<br>Nearly every day 3 | <input type="checkbox"/> |

STOP-COPY

To help people say how good or bad their state of health is, we have drawn a scale (rather like a thermometer) on which the best state you can imagine is marked 100 and the worst state you can imagine is marked 0.

I would like you to indicate on this scale how good or bad your own health is today, in your opinion.

Please do this by drawing a line from the box below to whichever point on the scale indicates how good or bad your state of health is today.

Your own  
state of health  
today

Best imaginable  
state of health

100

90

80

70

60

50

40

30

20

10

0

Worst imaginable  
state of health



**Section 14: Morbidity History**

|                                                                                              |                                                                                                                                                                                                              |                                                                                                                                                                                                                                                                |                                                                                                                                                                                                                                                                                                                                                                                                                                                                                                                                              |                                                                                                                                               |  |
|----------------------------------------------------------------------------------------------|--------------------------------------------------------------------------------------------------------------------------------------------------------------------------------------------------------------|----------------------------------------------------------------------------------------------------------------------------------------------------------------------------------------------------------------------------------------------------------------|----------------------------------------------------------------------------------------------------------------------------------------------------------------------------------------------------------------------------------------------------------------------------------------------------------------------------------------------------------------------------------------------------------------------------------------------------------------------------------------------------------------------------------------------|-----------------------------------------------------------------------------------------------------------------------------------------------|--|
| 14.1                                                                                         | <p>Have you ever been told by a doctor that you have any of the following diseases?</p> <p><i>[Yes =1; No =2; Don't know=9]</i></p>                                                                          | <p>a) Hypertension (High blood pressure)</p> <p>b) Diabetes (High Blood Sugar)</p> <p>c) Heart disease</p> <p>d) Urinary Tract Infection</p> <p>e) Kidney Stones</p> <p>f) Chronic Kidney Disease</p> <p>g) Musculoskeletal Diseases</p> <p>h) Any other :</p> | <div style="text-align: center;"> <input type="checkbox"/><br/> <input type="checkbox"/><br/> <input type="checkbox"/> </div>                                                                                                                                                                                                                                                                                                                                                                                                                |                                                                                                                                               |  |
| 14.2                                                                                         | <p>During the last 12 months, have you been medically diagnosed with urinary tract infection?</p>                                                                                                            | <p>Yes<br/>No</p>                                                                                                                                                                                                                                              |                                                                                                                                                                                                                                                                                                                                                                                                                                                                                                                                              |                                                                                                                                               |  |
| <p><b>Disease specific Questions (Hypertension) only if 14.1 Q , hypertension is yes</b></p> |                                                                                                                                                                                                              |                                                                                                                                                                                                                                                                |                                                                                                                                                                                                                                                                                                                                                                                                                                                                                                                                              |                                                                                                                                               |  |
| 14.3                                                                                         | <p>Since how long have you had high blood pressure?</p> <p>Please state duration in years and months</p>                                                                                                     |                                                                                                                                                                                                                                                                | <div style="display: flex; align-items: center; justify-content: center;"> <div style="border: 1px solid black; width: 30px; height: 30px; margin-right: 5px;"></div> <div style="border: 1px solid black; width: 30px; height: 30px; margin-right: 5px;"></div> <span style="margin: 0 5px;">Yrs</span> <div style="border: 1px solid black; width: 30px; height: 30px; margin-right: 5px;"></div> <div style="border: 1px solid black; width: 30px; height: 30px; margin-right: 5px;"></div> <span style="margin: 0 5px;">mn</span> </div> |                                                                                                                                               |  |
| 14.4                                                                                         | <p>Where do you obtain your medication?</p>                                                                                                                                                                  | <p>Pharmacy in government hospital</p> <p>Pharmacy in private hospital</p> <p>Local pharmacy in market</p> <p>Other, specify</p>                                                                                                                               | <p>01</p> <p>02</p> <p>03</p> <p>98</p>                                                                                                                                                                                                                                                                                                                                                                                                                                                                                                      | <div style="text-align: center;"> <input type="checkbox"/><br/>                 Other, specify:<br/>                 _____             </div> |  |
| 14.5                                                                                         | <p>What treatment are you taking for it currently?</p> <p><i>[Yes=1; No=2]</i></p> <p><i>*Traditional medicine / therapy include Yoga, Ayurveda, Unani, Homeopathy, Tibetan, Naturopathy, Meditation</i></p> | <p>a) Prescribed dietary modifications</p> <p>b) Prescribed physical exercise</p> <p>c) Traditional medicine / therapy*</p> <p>d) Allopathic drugs (English / modern)</p> <p>e) None</p>                                                                       | <div style="text-align: center;"> <input type="checkbox"/><br/> <input type="checkbox"/><br/> <input type="checkbox"/><br/> <input type="checkbox"/> </div>                                                                                                                                                                                                                                                                                                                                                                                  |                                                                                                                                               |  |
| <p><b>Measure of Medication Taking Behaviors (MMS-4)</b></p>                                 |                                                                                                                                                                                                              |                                                                                                                                                                                                                                                                |                                                                                                                                                                                                                                                                                                                                                                                                                                                                                                                                              |                                                                                                                                               |  |

|      |                                                                                                |               |                          |
|------|------------------------------------------------------------------------------------------------|---------------|--------------------------|
| 14.6 | Do you ever forget to take your hypertension medication?                                       | Yes 1<br>No 2 | <input type="checkbox"/> |
| 14.7 | Do you ever have problems remembering to take your hypertension medication?                    | Yes 1<br>No 2 | <input type="checkbox"/> |
| 14.8 | When you feel better, do you sometimes stop taking your hypertension medication?               | Yes 1<br>No 2 | <input type="checkbox"/> |
| 14.9 | Sometimes if you feel worse when you take your hypertension medication, do you stop taking it? | Yes 1<br>No 2 | <input type="checkbox"/> |

**Disease specific Questions (Kidney disease) only if 14.1 Q , Kidney disease question is yes**

|       |                                                                                              |                                                                                            |
|-------|----------------------------------------------------------------------------------------------|--------------------------------------------------------------------------------------------|
| 14.10 | Since how long have you had kidney disease?<br><br>Please state duration in years and months | <input type="text"/> <input type="text"/> Yrs <input type="text"/> <input type="text"/> mn |
|-------|----------------------------------------------------------------------------------------------|--------------------------------------------------------------------------------------------|

|       |                                                                                                                                                                                        |                                                                                                                                                                                     |                                                                                                              |
|-------|----------------------------------------------------------------------------------------------------------------------------------------------------------------------------------------|-------------------------------------------------------------------------------------------------------------------------------------------------------------------------------------|--------------------------------------------------------------------------------------------------------------|
| 14.11 | What treatment are you taking for it currently?<br>[Yes=1; No=2]<br><b>*Traditional medicine / therapy include Yoga, Ayurveda, Unani, Homeopathy, Tibetan, Naturopathy, Meditation</b> | a) Prescribed dietary modifications<br>b) Prescribed physical exercise<br>c) Traditional medicine / therapy*<br>d) Allopathic drugs (English / modern)<br>e) On Dialysis<br>f) None | <input type="checkbox"/><br><input type="checkbox"/><br><input type="checkbox"/><br><input type="checkbox"/> |
|-------|----------------------------------------------------------------------------------------------------------------------------------------------------------------------------------------|-------------------------------------------------------------------------------------------------------------------------------------------------------------------------------------|--------------------------------------------------------------------------------------------------------------|

|       |                                      |                                                                                                                           |                                                      |
|-------|--------------------------------------|---------------------------------------------------------------------------------------------------------------------------|------------------------------------------------------|
| 14.12 | Where do you obtain your medication? | Pharmacy in government hospital 01<br>Pharmacy in private hospital 02<br>Local pharmacy in market 03<br>Other, specify 98 | <input type="checkbox"/><br>Other, specify:<br>_____ |
|-------|--------------------------------------|---------------------------------------------------------------------------------------------------------------------------|------------------------------------------------------|

**Measure of Medication Taking Behaviours (MMS-4)**

|       |                                                                                         |               |                          |
|-------|-----------------------------------------------------------------------------------------|---------------|--------------------------|
| 14.13 | Do you ever forget to take your kidney medication?                                      | Yes 1<br>No 2 | <input type="checkbox"/> |
| 14.14 | Do you ever have problems remembering to take your kidney medication?                   | Yes 1<br>No 2 | <input type="checkbox"/> |
| 14.15 | When you feel better, do you sometimes stop taking your kidney medication?              | Yes 1<br>No 2 | <input type="checkbox"/> |
| 14.16 | Sometimes if you feel worse when you take your kidney medication, do you stop taking it | Yes 1<br>No 2 | <input type="checkbox"/> |

**Disease specific Questions (Diabetes disease) only if 14.1 Q , diabetes disease question is yes**

|       |                                                                                                                                                                                               |                                                                                                                                                                   |                                                                                                                                          |
|-------|-----------------------------------------------------------------------------------------------------------------------------------------------------------------------------------------------|-------------------------------------------------------------------------------------------------------------------------------------------------------------------|------------------------------------------------------------------------------------------------------------------------------------------|
| 14.17 | Since how long have you had high blood pressure?<br>Please state duration in years and months                                                                                                 | <input type="text"/> <input type="text"/> Yrs <input type="text"/> <input type="text"/> mn                                                                        |                                                                                                                                          |
| 14.18 | Where do you obtain your medication?                                                                                                                                                          | Pharmacy in government hospital<br>Pharmacy in private hospital<br>Local pharmacy in market<br>Other, specify                                                     | 01<br><input type="checkbox"/><br>02 Other, specify:<br>_____<br>03<br>98                                                                |
| 14.19 | What treatment are you taking for it currently?<br><i>[Yes=1; No=2]</i><br><i>*Traditional medicine / therapy include Yoga, Ayurveda, Unani, Homeopathy, Tibetan, Naturopathy, Meditation</i> | f) Prescribed dietary modifications<br>g) Prescribed physical exercise<br>h) Traditional medicine / therapy*<br>i) Allopathic drugs (English / modern)<br>j) None | <input type="checkbox"/><br><input type="checkbox"/><br><input type="checkbox"/><br><input type="checkbox"/><br><input type="checkbox"/> |

STOP - CKDUTP

## Physical measurements

| Blood Pressure                                                                                                                                    |                     |         |
|---------------------------------------------------------------------------------------------------------------------------------------------------|---------------------|---------|
| Question                                                                                                                                          | Response            |         |
| Interviewer ID                                                                                                                                    |                     | □ □ □ □ |
| Device ID for blood pressure                                                                                                                      |                     | □ □ □ □ |
| Cuff size used                                                                                                                                    | Small               | 1       |
|                                                                                                                                                   | Medium              | 2       |
|                                                                                                                                                   | Large               | 3       |
| Reading 1                                                                                                                                         | Systolic ( mmHg)    | □ □ □ □ |
|                                                                                                                                                   | Diastolic (mmHg)    | □ □ □ □ |
| Reading 2                                                                                                                                         | Systolic ( mmHg)    | □ □ □ □ |
|                                                                                                                                                   | Diastolic (mmHg)    | □ □ □ □ |
| Reading 3                                                                                                                                         | Systolic ( mmHg)    | □ □ □ □ |
|                                                                                                                                                   | Diastolic (mmHg)    | □ □ □ □ |
| During the past two weeks, have you been treated for raised blood pressure with drugs (medication) prescribed by a doctor or other health worker? | Yes                 | 1       |
|                                                                                                                                                   | No                  | 2       |
| Height, Weight                                                                                                                                    |                     |         |
| Height                                                                                                                                            | in Centimetres (cm) | □ □ □ □ |
| Weight<br><i>If too large for scale 666.6</i>                                                                                                     | in Kilograms (kg)   | □ □ □ □ |

## Lab measurements

| Question                                            | Response                      |                       |
|-----------------------------------------------------|-------------------------------|-----------------------|
| Blood sampling Investigator ID                      |                               | □ □ □ □               |
| Time of day blood specimen taken<br>(24 hour clock) | Hours: minutes                | □ □ : □ □<br>hrs mins |
| Serum Creatinine (mg/dl)                            | <i>to first decimal place</i> | □ □ □ □               |
| Urine Protein (g/dl)                                | <i>to two decimal places</i>  | □ □ □ □               |
| Urine Creatinine (mg/dL)                            | mg/dL                         | □ □ □ □               |
| HbA1c                                               |                               | □ □ □ □               |
